# Supplementary material
Source: ML conference proceedings conference paper supplement (https://proceedings.neurips.cc/paper_files/paper/2010/hash/46fc943ecd56441056a560ba37d0b9e8-Abstract.html)
Supplement: Supplementary file 1 [file 46fc943ecd56441056a560ba37d0b9e8-Supplemental.zip]

Archive with 1 entries (1 files):
- extra/NIPS2010_1265_extra.pdf
