# Supplementary material
Source: ML conference proceedings conference paper supplement (https://proceedings.neurips.cc/paper_files/paper/2010/hash/46fc943ecd56441056a560ba37d0b9e8-Abstract.html)
Supplement: Supplementary file 1 [file 46fc943ecd56441056a560ba37d0b9e8-Supplemental.zip › extra/NIPS2010_1265_extra.pdf]

---

# Supplement: A Theory of Multiclass Boosting

---

Indraneel Mukherjee

Robert E. Schapire

Princeton University  
Department of Computer Science  
Princeton NJ 08540  
{imukherj, schapire}@cs.princeton.edu

We give formal proofs for various claims made in the paper, roughly in their order of appearance. Recall that we have assumed that the true label  $y_i$  of example  $i$  in our training set is always 1. Nevertheless, we may occasionally continue to refer to the true labels as  $y_i$ .

## S.1 Minimax Theorem

We will make use of the following minimax result, that appears as Corollary 37.3.2 of [2].

**Theorem.** (Minimax Theorem) *Let  $C, D$  be non-empty closed convex subsets of  $\mathbb{R}^m, \mathbb{R}^n$  respectively, and let  $K$  be a continuous finite concave-convex function on  $C \times D$ . If either  $C$  or  $D$  is bounded, one has*

$$\min_{v \in D} \max_{u \in C} K(u, v) = \max_{u \in C} \min_{v \in D} K(u, v).$$

## S.2 Proof of Theorem 1

Applying the minimax theorem yields

$$0 \geq \max_{\mathbf{C} \in \mathcal{C}^{\text{cor}}} \min_{h \in \mathcal{H}} \mathbf{C} \bullet (\mathbf{1}_h - \mathbf{B}) = \min_{\boldsymbol{\lambda} \in \Delta(\mathcal{H})} \max_{\mathbf{C} \in \mathcal{C}^{\text{cor}}} \mathbf{C} \bullet (\mathbf{H}_{\boldsymbol{\lambda}} - \mathbf{B}),$$

where

$$\mathbf{H}_{\boldsymbol{\lambda}} \triangleq \sum_{h \in \mathcal{H}} \lambda(h) \mathbf{1}_h,$$

and where the first inequality follows from the definition (2) of the weak-learning condition. Let  $\boldsymbol{\lambda}^*$  be a minimizer of the min-max expression. Unless the first entry of each-row of  $(\mathbf{H}_{\boldsymbol{\lambda}^*} - \mathbf{B})$  is the largest, the right hand side of the min-max expression can be made arbitrarily large by choosing  $\mathbf{C} \in \mathcal{C}^{\text{cor}}$  appropriately. For example, if in some row  $i$ , the  $j_0$ th element is strictly larger than the first element, by choosing

$$C(i, j) = \begin{cases} -1 & \text{if } j = 1 \\ 1 & \text{if } j = j_0 \\ 0 & \text{otherwise,} \end{cases}$$

we get a matrix in  $\mathcal{C}^{\text{cor}}$  which causes  $\mathbf{C} \bullet (\mathbf{H}_{\boldsymbol{\lambda}^*} - \mathbf{B})$  to be equal to  $C(i, j_0) - C(i, 1) > 0$ , an impossibility by the first inequality.

Therefore, the convex combination of the weak classifiers, obtained by choosing each weak classifier with weight given by  $\boldsymbol{\lambda}^*$ , perfectly classifies the training data, in fact with a margin  $\gamma$ .

□

## S.3 Proof of Theorem 2

We will reuse notation from the proof of Theorem 1 above.  $\mathcal{H}$  is boostable implies there exists some distribution  $\boldsymbol{\lambda}^* \in \Delta(\mathcal{H})$  such that

$$\forall j \neq 1, i : \mathbf{H}_{\boldsymbol{\lambda}^*}(i, 1) - \mathbf{H}_{\boldsymbol{\lambda}^*}(i, j) > 0.$$

Let  $\gamma > 0$  be the minimum of the above expression over all possible  $(i, j)$ , and let  $\mathbf{B} = \mathbf{H}_{\lambda^*}$ . Then  $\mathbf{B} \in \mathcal{B}_\gamma^{\text{eor}}$ , and

$$\max_{\mathbf{C} \in \mathcal{C}^{\text{eor}}} \min_{h \in \mathcal{H}} \mathbf{C} \bullet (\mathbf{1}_h - \mathbf{B}) \leq \min_{\lambda \in \Delta(\mathcal{H})} \max_{\mathbf{C} \in \mathcal{C}^{\text{eor}}} \mathbf{C} \bullet (\mathbf{H}_\lambda - \mathbf{B}) \leq \max_{\mathbf{C} \in \mathcal{C}^{\text{eor}}} \mathbf{C} \bullet (\mathbf{H}_{\lambda^*} - \mathbf{B}) = 0,$$

where the equality follows since by definition  $\mathbf{H}_{\lambda^*} - \mathbf{B} = \mathbf{0}$ . The max-min expression is at most zero is another way of saying that  $\mathcal{H}$  satisfies the weak-learning condition  $(\mathcal{C}^{\text{eor}}, \mathbf{B} \in \mathcal{B}_\gamma^{\text{eor}})$  as in (2).  $\square$

#### S.4 Each edge-over-random condition is too strong

In Section 3 we mention that any single edge-over-random condition is too strong. Here we provide, for any  $\gamma > 0$  and edge-over-random baseline  $\mathbf{B} \in \mathcal{B}_\gamma^{\text{eor}}$ , a dataset and weak classifier space that is boostable but fails to satisfy the condition  $(\mathcal{C}^{\text{eor}}, \mathbf{B})$ .

Pick  $m > 1/\gamma$  so that  $\lfloor m(1/2 + \gamma) \rfloor > m/2$ . Our data-set will have  $m$  labeled examples  $\{(0, y_0), \dots, (m-1, y_{m-1})\}$ , and  $m$  weak classifiers. We want the following symmetries in our weak classifiers:

- Each weak classifier correctly classifies  $\lfloor m(1/2 + \gamma) \rfloor$  examples and misclassifies the rest.
- On each example,  $\lfloor m(1/2 + \gamma) \rfloor$  weak classifiers predict correctly.

Note the second property implies boostability, since the uniform convex combination of all the weak classifiers is a perfect predictor.

The two properties can be satisfied by the following design. A window is a contiguous sequence of examples that may wrap around; for example  $\{i, (i+1) \bmod m, \dots, (i+k) \bmod m\}$  is a window containing  $k$  elements, which may wrap around if  $i+k \geq m$ . For each window of length  $\lfloor m(1/2 + \gamma) \rfloor$  create a hypothesis that correctly classifies within the window, and misclassifies outside. This weak-hypothesis space has size  $m$ , and has the required properties.

We still have flexibility as to how the misclassifications occur, and which cost-matrix to use, which brings us to the next two choices:

- Whenever a hypothesis misclassifies on example  $i$ , it predicts label  $\hat{y}_i \triangleq \text{argmin} \{B(i, l) : l \neq y_i\}$ .
- A cost-matrix is chosen so that the cost of predicting  $\hat{y}_i$  on example  $i$  is 1, but for any other prediction the cost is zero. Observe this cost-matrix belongs to  $\mathcal{C}^{\text{eor}}$ .

Therefore, every time a weak classifier predicts incorrectly, it also suffers cost 1. Since each weak classifier predicts correctly only within a window of length  $\lfloor m(1/2 + \gamma) \rfloor$ , it suffers cost  $\lceil m(1/2 - \gamma) \rceil$ . On the other hand, by definition,  $B(i, \hat{y}_i) \leq 1/k - \gamma$ . So the cost of  $\mathbf{B}$  on the chosen cost-matrix is  $m(1/k - \gamma)$ , which is less than the cost  $\lceil m(1/2 - \gamma) \rceil$  of any weak classifier whenever the number of labels  $k$  is more than two. Hence our boostable space of weak classifiers fails to satisfy  $(\mathcal{C}^{\text{eor}}, \mathbf{B})$ .  $\square$

#### S.5 Conditions for AdaBoost.MH and AdaBoost.MR in our framework

In Section 3, we have stated the conditions in our framework corresponding to AdaBoost.MH and AdaBoost.MR [4]. Here we provide proofs showing that our conditions match the ones in the original paper.

**Theorem.** *The weak-learning condition used by AdaBoost.MH [4] is equivalent to  $(\mathcal{C}^{\text{MH}}, \mathbf{B}_\gamma^{\text{MH}})$ , and that used by AdaBoost.MR [4] is equivalent to  $(\mathcal{C}^{\text{MR}}, \mathbf{B}_\gamma^{\text{MR}})$ .*

*Proof.* AdaBoost.MH [4] was originally designed to use weak-hypotheses that return a prediction for every example and every label. They require that for any matrix with non-negative entries  $d(i, l)$ ,

the weak-hypothesis should achieve  $1/2 + \gamma$  accuracy

$$\begin{aligned} & \sum_{i=1}^m \left( \mathbb{1}[h(x_i) \neq y_i] d(i, y_i) + \sum_{l \neq y_i} \mathbb{1}[h(x_i) = l] d(i, l) \right) \\ & \leq (1/2 - \gamma) \sum_{i=1}^m \sum_{l=1}^k d(i, l). \end{aligned} \quad (\text{S.1})$$

This can be rewritten as

$$\begin{aligned} & \sum_{i=1}^m \left( -\mathbb{1}[h(x_i) = y_i] d(i, y_i) + \sum_{l \neq y_i} \mathbb{1}[h(x_i) = l] d(i, l) \right) \\ & \leq \sum_{i=1}^m \left( (1/2 - \gamma) \sum_{l \neq y_i} d(i, l) - (1/2 + \gamma) d(i, y_i) \right). \end{aligned}$$

Using the mapping

$$C(i, l) = \begin{cases} d(i, l) & \text{if } l \neq y_i \\ -d(i, l) & \text{if } l = y_i, \end{cases}$$

their weak-learning condition may be rewritten as follows

$$\begin{aligned} & \forall \mathbf{C} \in \mathbb{R}^{m \times k} \text{ satisfying } \{C(i, y_i) \leq 0, C(i, l) \geq 0 \text{ for } l \neq y_i\}, \exists h \in \mathcal{H} : \\ & \sum_{i=1}^m C(i, h(x_i)) \leq \sum_{i=1}^m \left( (1/2 + \gamma) C(i, y_i) + (1/2 - \gamma) \sum_{l \neq y_i} C(i, l) \right). \end{aligned}$$

Finally using the fact that we have assumed (without loss of generality) that  $\forall i : y_i = 1$ , the above condition is the same as

$$\forall \mathbf{C} \in \mathcal{C}^{\text{MH}}, \exists h \in \mathcal{H} : \mathbf{C} \bullet (\mathbf{1}_h - \mathbf{B}_\gamma^{\text{MH}}) \leq 0,$$

i.e. the  $(\mathcal{C}^{\text{MH}}, \mathbf{B}_\gamma^{\text{MH}})$  weak-learning condition.

AdaBoost.MR [4] is a variant of AdaBoost.MH. For any non-negative cost-vectors  $\{d(i, l)\}_{l \neq y_i}$ , the weak-hypothesis returned should satisfy the following

$$\begin{aligned} & \sum_{i=1}^m \sum_{l \neq y_i} (\mathbb{1}[h(x_i) = l] - \mathbb{1}[h(x_i) = y_i]) d(i, l) \leq -2\gamma \sum_{i=1}^m \sum_{l \neq y_i} d(i, l) \\ \text{i.e. } & \sum_{i=1}^m \left( -\mathbb{1}[h(x_i) = y_i] \sum_{l \neq y_i} d(i, l) + \sum_{l \neq y_i} \mathbb{1}[h(x_i) = l] d(i, l) \right) \leq -2\gamma \sum_{i=1}^m \sum_{l \neq y_i} d(i, l) \end{aligned}$$

Substituting

$$C(i, l) = \begin{cases} d(i, l) & l \neq y_i \\ -\sum_{l \neq y_i} d(i, l) & l = y_i, \end{cases}$$

we may rewrite AdaBoost.MR's weak-learning condition as

$$\begin{aligned} & \forall \mathbf{C} \in \mathbb{R}^{m \times k} \text{ satisfying } \left\{ C(i, l) \geq 0 \text{ for } l \neq y_i, C(i, y_i) = -\sum_{l \neq y_i} C(i, l) \right\}, \exists h \in \mathcal{H} : \\ & \sum_{i=1}^m C(i, h(x_i)) \leq -\gamma \sum_{i=1}^m \left( -C(i, y_i) + \sum_{l \neq y_i} C(i, l) \right). \end{aligned}$$

Again using the fact that we have assumed  $\forall i : y_i = 1$ , the above condition is the same as

$$\forall \mathbf{C} \in \mathcal{C}^{\text{MR}}, \exists h \in \mathcal{H} : \mathbf{C} \bullet (\mathbf{1}_h - \mathbf{B}_\gamma^{\text{MR}}) \leq 0,$$

i.e. the  $(\mathcal{C}^{\text{MR}}, \mathbf{B}_\gamma^{\text{MR}})$  weak-learning condition.

□

## S.6 Weak-learning conditions of AdaBoost.MH and AdaBoost.M1 are same in our framework

Here we prove the claim, made in Section 1, that the weak-learning conditions of AdaBoost.MH and AdaBoost.M1 [1] are identical in our framework.

We first rewrite the conditons used by AdaBoost.M1 in the language of our framework. Adaboost.M1 [1] requires  $1/2 + \gamma$  accuracy with respect to any non-negative weights  $d(1), \dots, d(m)$  on the training set,

$$\begin{aligned} \sum_{i=1}^m d(i) \mathbb{1}[h(x_i) \neq y_i] &\leq (1/2 - \gamma) \sum_{i=1}^m d(i), \\ \text{i.e. } \sum_{i=1}^m d(i) \llbracket h(x_i) \neq y_i \rrbracket &\leq -2\gamma \sum_{i=1}^m d(i). \end{aligned} \quad (\text{S.2})$$

where  $\llbracket \cdot \rrbracket$  is the  $\pm$  indicator function, taking value  $+1$  when its argument is true, and  $-1$  when false. Using the transformation

$$C(i, l) = \llbracket l \neq y_i \rrbracket d(i)$$

we may rewrite the above condition as

$$\forall C \in \mathbb{R}^{m \times k} \text{ satisfying } \{0 \leq -C(i, y_i) = C(i, l) \text{ for } l \neq y_i\}, \quad (\text{S.3})$$

$$\begin{aligned} \exists h \in \mathcal{H} : \sum_{i=1}^m C(i, h(x_i)) &\leq 2\gamma \sum_{i=1}^m C(i, y_i) \\ \text{i.e. } \forall C \in \mathcal{C}^{\text{M1}}, \exists h \in \mathcal{H} : C \bullet (\mathbf{1}_h - \mathbf{B}_\gamma^{\text{M1}}) &\leq 0, \end{aligned} \quad (\text{S.4})$$

where  $\mathbf{B}_\gamma^{\text{M1}}(i, l) = 2\gamma \mathbb{1}[l = y_i]$ , and  $\mathcal{C}^{\text{M1}} \subset \mathbb{R}^{m \times k}$  consists of matrices satisfying the constraints in (S.3).

We now show the equivalence of the weak-learning conditions of AdaBoost.M1 and AdaBoost.MH.

**Lemma.** *A weak classifier space  $\mathcal{H}$  satisfies  $(\mathcal{C}^{\text{M1}}, \mathbf{B}_\gamma^{\text{M1}})$  if and only if it satisfies  $(\mathcal{C}^{\text{MH}}, \mathbf{B}_\gamma^{\text{MH}})$ .*

*Proof.* We will refer to  $(\mathcal{C}^{\text{M1}}, \mathbf{B}_\gamma^{\text{M1}})$  by M1 and  $(\mathcal{C}^{\text{MH}}, \mathbf{B}_\gamma^{\text{MH}})$  by MH for brevity. The proof is in three steps.

*Step (i):*  $\mathcal{H}$  satisfies M1 implies  $\mathcal{H}$  satisfies MH. This follows since any constraint (S.2) imposed by M1 on  $\mathcal{H}$  can be reproduced by MH by plugging the following values of  $d(i, l)$  in (S.1)

$$d(i, l) = \begin{cases} d(i) & \text{if } l = y_i \\ 0 & \text{if } l \neq y_i. \end{cases}$$

*Step (ii):*  $\mathcal{H}$  satisfies M1 implies there is a convex combination  $\mathbf{H}_\lambda$  of the matrices  $\mathbf{1}_h \in \mathcal{H}$  such that

$$\forall i : (\mathbf{H}_\lambda - \mathbf{B}_\gamma^{\text{MH}})(i, l) \begin{cases} \geq 0 & \text{if } l = y_i \\ \leq 0 & \text{if } l \neq y_i. \end{cases}$$

Indeed, the minmax theorem yields

$$\min_{\lambda \in \Delta(\mathcal{H})} \max_{C \in \mathcal{C}^{\text{M1}}} C \bullet (\mathbf{H}_\lambda - \mathbf{B}_\gamma^{\text{M1}}) = \max_{C \in \mathcal{C}^{\text{M1}}} \min_{h \in \mathcal{H}} C \bullet (\mathbf{1}_h - \mathbf{B}_\gamma^{\text{M1}}) \leq 0,$$

where the inequality is a restatement of our assumption that  $\mathcal{H}$  satisfies M1. If  $\lambda$  is a minimizer of the minmax expression, then  $\mathbf{H}_\lambda$  must satisfy

$$\forall i : \mathbf{H}_\lambda(i, l) \begin{cases} \geq 1/2 + \gamma & \text{if } l = y_i \\ \leq 1/2 - \gamma & \text{if } l \neq y_i, \end{cases} \quad (\text{S.5})$$

or else some choice of  $C \in \mathcal{C}^{\text{M1}}$  can cause  $C \bullet (\mathbf{H}_\lambda - \mathbf{B}_\gamma^{\text{M1}})$  to exceed 0. In particular, if  $\mathbf{H}_\lambda(i_0, l) < 1/2 + \gamma$ , then

$$(\mathbf{H}_\lambda - \mathbf{B}_\gamma^{\text{M1}})(i_0, y_{i_0}) < \sum_{l \neq y_{i_0}} (\mathbf{H}_\lambda - \mathbf{B}_\gamma^{\text{M1}})(i_0, l).$$

Now, if we choose  $\mathbf{C} \in \mathcal{C}^{\text{M1}}$  as

$$C(i, l) = \begin{cases} 0 & \text{if } i \neq i_0 \\ 1 & \text{if } i = i_0, l \neq y_{i_0} \\ -1 & \text{if } i = i_0, l = y_{i_0}, \end{cases}$$

then,

$$\mathbf{C} \bullet (\mathbf{H}_\lambda - \mathbf{B}_\gamma^{\text{M1}}) = -(\mathbf{H}_\lambda - \mathbf{B}_\gamma^{\text{M1}})(i_0, y_{i_0}) + \sum_{l \neq y_{i_0}} (\mathbf{H}_\lambda - \mathbf{B}_\gamma^{\text{M1}})(i_0, l) > 0,$$

contradicting the minmax inequality. Therefore some  $\mathbf{H}_\lambda$  satisfying (S.5) exists. Step (ii) now follows by observing that  $\mathbf{B}_\gamma^{\text{MH}}$  satisfies

$$\forall i : \mathbf{B}_\gamma^{\text{MH}}(i, l) = \begin{cases} 1/2 + \gamma & \text{if } l = y_i \\ 1/2 - \gamma & \text{if } l \neq y_i. \end{cases}$$

*Step (iii)* If  $\mathcal{H}$  satisfies M1's conditions, then Step (ii) implies

$$0 \geq \min_{\lambda \in \Delta(\mathcal{H})} \max_{\mathbf{C} \in \mathcal{C}^{\text{MH}}} \mathbf{C} \bullet (\mathbf{H}_\lambda - \mathbf{B}_\gamma^{\text{MH}}) = \max_{\mathbf{C} \in \mathcal{C}^{\text{MH}}} \min_{h \in \mathcal{H}} \mathbf{C} \bullet (\mathbf{1}_h - \mathbf{B}_\gamma^{\text{MH}}),$$

where the equality follows from the minimax theorem. The max min expression at most zero encodes  $\mathbf{B}^{\text{MH}}$ 's weak-learning condition. Hence  $\mathcal{H}$  satisfies M1 implies  $\mathcal{H}$  satisfies MH. Together with Step (i), this completes the proof.  $\square$

### S.7 Proof of Theorem 3

We will show the following three conditions are equivalent:

- (A)  $\mathcal{H}$  is boostable
- (B)  $\exists \gamma > 0$  such that  $\forall \mathbf{C} \in \mathcal{C}^{\text{cor}}, \exists h \in \mathcal{H} : \mathbf{C} \bullet \mathbf{1}_h \leq \max_{\mathbf{B} \in \mathcal{B}_\gamma^{\text{cor}}} \mathbf{C} \bullet \mathbf{B}$
- (C)  $\exists \gamma > 0 : \mathcal{H}$  satisfies  $(\mathcal{C}^{\text{MR}}, \mathbf{B}_\gamma^{\text{MR}})$ .

We will show (A) implies (B), (B) implies (C), and (C) implies (A) to achieve the above.

(A) *implies* (B): Immediate from Theorem 2.

(B) *implies* (C): Suppose (B) is satisfied with  $2\gamma$ . We will show that this implies  $\mathcal{H}$  satisfies  $(\mathcal{C}^{\text{MR}}, \mathbf{B}_\gamma^{\text{MR}})$ . Notice  $\mathcal{C}^{\text{MR}} \subset \mathcal{C}^{\text{cor}}$ . Therefore it suffices to show that

$$\forall \mathbf{C} \in \mathcal{C}^{\text{MR}}, \mathbf{B} \in \mathcal{B}_{2\gamma}^{\text{cor}} : \mathbf{C} \bullet (\mathbf{B} - \mathbf{B}_\gamma^{\text{MR}}) \leq 0.$$

Notice that  $\mathbf{B} \in \mathcal{Q}^{2\gamma}$  implies  $\mathbf{B}' = \mathbf{B} - \mathbf{B}_\gamma^{\text{MR}}$  belongs to  $\mathcal{B}_0^{\text{cor}}$ . Then, for any  $\mathbf{C} \in \mathcal{C}^{\text{MR}}$ ,  $\mathbf{C} \bullet \mathbf{B}'$  can be written as

$$\mathbf{C} \bullet \mathbf{B}' = \sum_{i=1}^m \sum_{j=2}^k C(i, j) (B'(i, j) - B'(i, 1)).$$

Since  $C(i, j) \geq 0$  for  $j > 1$ , and  $B'(i, j) - B'(i, 1) \leq 0$ , we have our result.

(C) *implies* (A): Applying the minimax theorem,

$$0 \geq \max_{\mathbf{C} \in \mathcal{C}^{\text{MR}}} \min_{h \in \mathcal{H}} \mathbf{C} \bullet (\mathbf{1}_h - \mathbf{B}_\gamma^{\text{MR}}) = \min_{\lambda \in \Delta(\mathcal{H})} \max_{\mathbf{C} \in \mathcal{C}^{\text{MR}}} \mathbf{C} \bullet (\mathbf{H}_\lambda - \mathbf{B}_\gamma^{\text{MR}}).$$

For any  $i_0$  and  $l_0 \neq 1$ , the following cost-matrix  $\mathbf{C}$  satisfies  $\mathbf{C} \in \mathcal{C}^{\text{MR}}$ ,

$$C(i, l) = \begin{cases} 0 & \text{if } i \neq i_0 \text{ or } l \notin \{1, l_0\} \\ 1 & \text{if } i = i_0, l = l_0 \\ -1 & \text{if } i = i_0, l = 1. \end{cases}$$

Let  $\lambda$  belong to the argmin of the min max expression. Then  $\mathbf{C} \bullet (\mathbf{H}_\lambda - \mathbf{B}_\gamma^{\text{MR}}) \leq 0$  implies  $\mathbf{H}_\lambda(i_0, 1) - \mathbf{H}_\lambda(i_0, l_0) \geq 2\gamma$ . Since this is true for all  $i_0$  and  $l_0 \neq 1$ , we conclude that the  $(\mathcal{C}^{\text{MR}}, \mathbf{B}_\gamma^{\text{MR}})$  condition implies boostability.

This concludes the proof of equivalence.  $\square$

## S.8 Proof of Theorem 5

Let  $\mathcal{C}_0^{\text{cor}} \subseteq \mathbb{R}^k$  denote all vectors  $\mathbf{c}$  satisfying  $\forall l : c(1) \leq c(l)$ . Then, we have

$$\begin{aligned}
\phi_t^{\mathbf{b}}(\mathbf{s}) &= \min_{\mathbf{c} \in \mathcal{C}_0^{\text{cor}}} \max_{\substack{\mathbf{p} \in \Delta\{1, \dots, k\} \\ \text{s.t.} \quad \mathbb{E}_{l \sim \mathbf{p}}[\phi_{t-1}(\mathbf{s} + \mathbf{e}_l)] \\ &\quad \mathbb{E}_{l \sim \mathbf{p}}[c(l)] \leq \mathbb{E}_{l \sim \mathbf{b}}[c(l)]}} \mathbb{E}_{l \sim \mathbf{p}}[\phi_{t-1}(\mathbf{s} + \mathbf{e}_l)] \quad (\text{by (4)}) \\
&= \min_{\mathbf{c} \in \mathcal{C}_0^{\text{cor}}} \max_{\mathbf{p} \in \Delta} \min_{\lambda \geq 0} \{ \mathbb{E}_{l \sim \mathbf{p}}[\phi_{t-1}(\mathbf{s} + \mathbf{e}_l)] + \lambda (\mathbb{E}_{l \sim \mathbf{b}}[c(l)] - \mathbb{E}_{l \sim \mathbf{p}}[c(l)]) \} \quad (\text{Lagrangean}) \\
&= \min_{\mathbf{c} \in \mathcal{C}_0^{\text{cor}}} \min_{\lambda \geq 0} \max_{\mathbf{p} \in \Delta} \mathbb{E}_{l \sim \mathbf{p}}[\phi_{t-1}(\mathbf{s} + \mathbf{e}_l)] + \lambda \langle \mathbf{b} - \mathbf{p}, \mathbf{c} \rangle \quad (\text{min-max theorem}) \\
&= \min_{\mathbf{c} \in \mathcal{C}_0^{\text{cor}}} \max_{\mathbf{p} \in \Delta} \mathbb{E}_{l \sim \mathbf{p}}[\phi_{t-1}(\mathbf{s} + \mathbf{e}_l)] + \langle \mathbf{b} - \mathbf{p}, \mathbf{c} \rangle \quad (\text{absorb } \lambda \text{ into } \mathbf{c}) \\
&= \max_{\mathbf{p} \in \Delta} \min_{\mathbf{c} \in \mathcal{C}_0^{\text{cor}}} \mathbb{E}_{l \sim \mathbf{p}}[\phi_{t-1}(\mathbf{s} + \mathbf{e}_l)] + \langle \mathbf{b} - \mathbf{p}, \mathbf{c} \rangle \quad (\text{min-max theorem}).
\end{aligned}$$

Unless  $q(1) - p(1) \leq 0$  and  $q(l) - p(l) \geq 0$  for each  $l > 1$ , the quantity  $\langle \mathbf{b} - \mathbf{p}, \mathbf{c} \rangle$  can be made arbitrarily small for appropriate choices of  $\mathbf{c} \in \mathcal{C}_0^{\text{cor}}$ . The max-player is therefore forced to constrain its choices of  $\mathbf{p}$ , and the above expression becomes

$$\max_{\substack{\mathbf{p} \in \Delta \\ p(1) \geq q(1), \forall l > 1: p(l) \leq q(l)}} \mathbb{E}_{l \sim \mathbf{p}}[\phi_{t-1}(\mathbf{s} + \mathbf{e}_l)]$$

Lemma 6 of [3] states that if  $L$  is *proper* (as defined in *our* paper), so is  $\phi_t$ ; the same result can be extended to our drifting games. This implies the optimal choice of  $\mathbf{p}$  in the above expression is in fact the distribution that puts as small weight as possible in the first coordinate, namely  $\mathbf{b}$ .

Therefore the optimum choice of  $\mathbf{p}$  is  $\mathbf{b}$ , and the potential is the same as

$$\phi_t(\mathbf{s}) = \mathbb{E}_{l \sim \mathbf{b}}[\phi_{t-1}(\mathbf{s} + \mathbf{e}_l)].$$

Inductively assuming  $\phi_{t-1}(\mathbf{x}) = \mathbb{E}[L(\mathcal{R}_{\mathbf{b}}^{t-1}(\mathbf{x}))]$ ,

$$\begin{aligned}
\phi_t(\mathbf{s}) &= \mathbb{E}_{l \sim \mathbf{b}}[L(\mathcal{R}_{\mathbf{b}}^{t-1}(\mathbf{s}) + \mathbf{e}_l)] \\
&= \mathbb{E}[L(\mathcal{R}_{\mathbf{b}}^t(\mathbf{s}))].
\end{aligned}$$

The last equality follows by observing that the random position  $\mathcal{R}_{\mathbf{b}}^{t-1}(\mathbf{s}) + \mathbf{e}_l$  is distributed as  $\mathcal{R}_{\mathbf{b}}^t(\mathbf{s})$  when  $l$  is sampled from  $\mathbf{b}$ .  $\square$

## S.9 Calculations for the Adaptive case

While discussing the adaptive algorithm we mention how to choose the weights  $\alpha_t$  in each round. Here are formal proofs to back up some of the claims made in that section.

**Lemma.** Suppose cost matrix  $\mathbf{C}_t$  is chosen as in (7), and the returned weak classifier  $h_t$  beats  $\mathbf{U}_{\delta_t}$  on  $\mathbf{C}_t$  i.e.  $\mathbf{C}_t \bullet \mathbf{1}_{h_t} \leq \mathbf{C}_t \bullet \mathbf{U}_{\delta_t}$ . Then choosing any weight  $\alpha_t > 0$  for  $h_t$  makes the loss at time  $t$ ,  $\sum_{i=1}^m \sum_{l=2}^k e^{\{f_t(i,l) - f_t(i,1)\}}$ , at most a factor

$$1 - \frac{1}{2}(e^{\alpha_t} - e^{-\alpha_t})\delta_t + \frac{1}{2}(e^{\alpha_t} + e^{-\alpha_t} - 2)$$

of the loss before choosing,  $\sum_{i=1}^m \sum_{l=2}^k e^{\{f_{t-1}(i,l) - f_{t-1}(i,1)\}}$ .

*Proof.* Let  $S_+, S_-$  denote the set of examples where  $h_t$  classified correctly, incorrectly resp. Also let  $L_t(i)$  denote the sum  $\sum_{l=2}^k e^{f_t(i,l) - f_t(i,1)}$ . Then the loss after  $t$  rounds is  $\sum_{i \in S_+ \cup S_-} L_t(i)$ . Further  $C_t(i, 1) = -L_{t-1}(i)$ . By the edge-condition

$$\begin{aligned}
- \sum_{i \in S_+} L_{t-1}(i) + \sum_{i \in S_-} e^{\{f_{t-1}(i, h_t(x_i)) - f_{t-1}(i, 1)\}} &= \mathbf{C}_t \bullet \mathbf{1}_{h_t} \leq \mathbf{C}_t \bullet \mathbf{U}_{\delta_t} = -\delta_t \sum_{i \in S_+ \cup S_-} L_{t-1}(i), \\
\text{i.e., } \sum_{i \in S_+} L_{t-1}(i) - \sum_{i \in S_-} e^{\{f_{t-1}(i, h_t(x_i)) - f_{t-1}(i, 1)\}} &\geq \delta_t \sum_{i \in S_+ \cup S_-} L_{t-1}(i).
\end{aligned}$$

On the other hand, the drop in loss after choosing  $h_t$  with weight  $\alpha_t$  is

$$\begin{aligned} & \sum_{i \in S_+} (1 - e^{-\alpha_t}) L_{t-1}(i) - \sum_{i \in S_-} (e^{\alpha_t} - 1) e^{\{f_{t-1}(i, h_t(x_i)) - f_{t-1}(i, 1)\}} \\ &= \left( \frac{e^{\alpha_t} - e^{-\alpha_t}}{2} \right) \left\{ \sum_{i \in S_+} L_{t-1}(i) - \sum_{i \in S_-} e^{\{f_{t-1}(i, h_t(x_i)) - f_{t-1}(i, 1)\}} \right\} \\ &- \left( \frac{e^{\alpha_t} + e^{-\alpha_t} - 2}{2} \right) \left\{ \sum_{i \in S_+} L_{t-1}(i) + \sum_{i \in S_-} e^{\{f_{t-1}(i, h_t(x_i)) - f_{t-1}(i, 1)\}} \right\}. \end{aligned}$$

Now  $e^{\{f_{t-1}(i, h_t(x_i)) - f_{t-1}(i, 1)\}}$  is upper bounded by  $L_{t-1}(i)$ , so that the second term in curly brackets is upper bounded by the loss after  $t - 1$  rounds. We have already shown the first term in curly brackets is at least  $\delta_t$  times the loss after  $t - 1$  rounds. Hence the loss in round  $t$  is at most a factor  $1 - \frac{1}{2}(e^{\alpha_t} - e^{-\alpha_t})\delta_t + \frac{1}{2}(e^{\alpha_t} + e^{-\alpha_t} - 2)$  of the loss in round  $t - 1$ .  $\square$

**Corollary.** Suppose  $\mathbf{C}_t$  is chosen as in (7). Then if  $h_t$  beats  $\mathbf{U}_{\delta_t}$ , for some  $\delta_t \in [0, 1]$ , on  $\mathbf{C}_t$ , then for any  $\alpha_t > 0$ , there is a  $\gamma_t \in [1 - k, 1]$  such that

- $h_t$  beats  $\mathbf{U}_{\gamma_t}$  on  $\mathbf{C}_{\alpha_t}$ , where  $\mathbf{C}_{\alpha_t}$  is defined as in (7), and
- $\kappa(\gamma_t, \alpha_t) \leq g(\alpha_t, \delta_t) \triangleq 1 - \frac{1}{2}(e^{\alpha_t} - e^{-\alpha_t})\delta_t + \frac{1}{2}(e^{\alpha_t} + e^{-\alpha_t} - 2)$ .

*Proof.* Recall  $\kappa(\gamma_t, \alpha_t) = 1 + \frac{1-\gamma_t}{k} (e^{\alpha_t} - e^{-\alpha_t}) - \gamma_t(1 - e^{-\alpha_t})$ . If  $g(\alpha_t, \delta_t) > \sup_{\gamma_t \in [1-k, 1]} \kappa(\gamma_t, \alpha_t)$ , then the choice of  $\gamma_t = 1 - k$  satisfies the requirements in the statement of the corollary. Otherwise observe

$$\kappa(0, \alpha_t) = e^{-\alpha_t} \leq g(\alpha_t, \delta_t),$$

so that, by continuity of  $\kappa$ , we may pick a value of  $\gamma_t$  such that  $\kappa(\gamma_t, \alpha_t) = g(\alpha_t, \delta_t)$ . As before, define  $L_t(i) = \sum_{l=2}^k e^{\{f_t(i, l) - f_t(i, 1)\}}$ . By expanding out one may see

$$\sum_{i=1}^m L_{t-1}(i) + \alpha_t \mathbf{C}_{\alpha_t} \bullet \mathbf{U}_{\gamma_t} = \kappa(\gamma_t, \alpha_t) \sum_{i=1}^m L_{t-1}(i).$$

Similarly one may verify,

$$\sum_{i=1}^m L_{t-1}(i) + \alpha_t \mathbf{C}_{\alpha_t} \bullet \mathbf{1}_{h_t} = \sum_{i=1}^m L_t(i).$$

The previous lemma yields  $\sum_{i=1}^m L_t(i) \leq g(\alpha_t, \delta_t) \sum_{i=1}^m L_{t-1}(i) = \kappa(\gamma_t, \alpha_t) \sum_{i=1}^m L_{t-1}(i)$ . This shows  $h_t$  beats  $\mathbf{U}_{\gamma_t}$  on  $\mathbf{C}_{\alpha_t}$ .  $\square$

## References

- [1] Yoav Freund and Robert E. Schapire. A decision-theoretic generalization of on-line learning and an application to boosting. *Journal of Computer and System Sciences*, 55(1):119–139, August 1997.
- [2] R. Tyrell Rockafellar. *Convex Analysis*. Princeton University Press, 1970.
- [3] Robert E. Schapire. Drifting games. *Machine Learning*, 43(3):265–291, June 2001.
- [4] Robert E. Schapire and Yoram Singer. Improved boosting algorithms using confidence-rated predictions. *Machine Learning*, 37(3):297–336, December 1999.
